# Supplementary material
Source: PubMed Central journal article supplement (PMC3675831)
Supplement: Supp_Table1.pdf [file Supp_Table1.pdf]

## Supplementary Data

SUPPLEMENTARY TABLE S1. DEMOGRAPHIC, CLINICAL, AND BIOCHEMICAL CHARACTERISTICS OF THE PATIENTS ACCORDING TO THE STATUS OF ANTI-THYROID PEROXIDASE ANTIBODIES AT THE TIME OF COMMENCEMENT OF THYROID HORMONE REPLACEMENT THERAPY

|                                      | Total (n=113) | Hashimoto's SCH (n=45) | Non-Hashimoto's SCH (n=68) | p-Value |
|--------------------------------------|---------------|------------------------|----------------------------|---------|
| Age (years)                          | 63.2±12.7     | 59.7±12.3              | 60.5±12.9                  | 0.74    |
| Men                                  | 36 (31.9%)    | 17 (37.8%)             | 19 (27.9%)                 | 0.27    |
| DM                                   | 44 (38.9%)    | 20 (44.4%)             | 24 (35.3%)                 | 0.33    |
| Hypertension                         | 69 (61.1%)    | 30 (66.7%)             | 39 (57.4%)                 | 0.32    |
| CVD                                  | 17 (15.0%)    | 7 (15.6%)              | 10 (14.7%)                 | 0.92    |
| Primary disease                      |               |                        |                            |         |
| Diabetic nephropathy                 | 44 (38.9%)    | 20 (44.4%)             | 24 (35.3%)                 | 0.33    |
| Hypertensive nephrosclerosis         | 42 (37.2%)    | 18 (40.0%)             | 24 (35.3%)                 | 0.61    |
| Chronic GN                           | 17 (15.1%)    | 5 (11.1%)              | 12 (17.6%)                 | 0.34    |
| Tubulointerstitial nephritis         | 6 (5.3%)      | 2 (4.4%)               | 4 (6.0%)                   | 0.73    |
| Others                               | 4 (3.5%)      | 0 (0%)                 | 4 (5.9%)                   | 0.10    |
| Systolic blood pressure (mmHg)       | 148.9±17.8    | 146.8±14.6             | 150.2±19.7                 | 0.49    |
| Diastolic blood pressure (mmHg)      | 86.5±11.0     | 85.9±11.2              | 86.9±11.0                  | 0.74    |
| Mean arterial pressure (mmHg)        | 107.3±11.7    | 106.2±10.7             | 108.0±12.5                 | 0.58    |
| Thyroid function test                |               |                        |                            |         |
| T3 (ng/mL)                           | 1.08±0.29     | 1.08±0.27              | 1.08±0.31                  | 0.89    |
| fT4 (ng/dL)                          | 1.09±0.22     | 1.10±0.25              | 1.10±0.20                  | 0.99    |
| TSH (μIU/mL)                         | 8.86±5.71     | 9.95±7.48              | 8.14±4.07                  | 0.14    |
| Serum creatinine (mg/dL)             | 1.28±0.50     | 1.29±0.51              | 1.27±0.50                  | 0.85    |
| eGFR ([mL/min]/1.73 m <sup>2</sup> ) | 59.5±16.3     | 58.6±16.0              | 60.1±16.6                  | 0.64    |
| Serum albumin (g/dL)                 | 4.03±0.89     | 4.10±0.76              | 3.99±0.98                  | 0.52    |
| Serum calcium (mg/dL)                | 9.26±0.65     | 9.35±0.73              | 9.20±0.59                  | 0.24    |
| Serum phosphate (mg/dL)              | 3.84±0.59     | 3.82±0.62              | 3.85±0.57                  | 0.78    |
| Serum cholesterol (mg/dL)            | 171.2±35.5    | 170.4±32.7             | 171.8±37.5                 | 0.83    |
| Serum triglyceride (mg/dL)           | 156.4±111.8   | 136.3±72.0             | 169.0±129.9                | 0.20    |
| Medication use                       |               |                        |                            |         |
| RAS blockers                         | 78 (69.0%)    | 31 (68.9%)             | 47 (69.1%)                 | 0.98    |
| Calcium channel blockers             | 37 (32.7%)    | 14 (31.1%)             | 23 (33.8%)                 | 0.76    |
| β-blockers                           | 30 (26.5%)    | 10 (22.2%)             | 20 (29.4%)                 | 0.40    |
| Diuretics                            | 43 (38.1%)    | 18 (40.0%)             | 25 (36.8%)                 | 0.73    |
| Other anti-hypertensive drugs        | 5 (4.4%)      | 0 (0.0%)               | 5 (7.4%)                   | 0.06    |
| Statins                              | 36 (31.9%)    | 14 (31.1%)             | 22 (32.4%)                 | 0.89    |

Values are expressed as mean±standard deviation or number (percentage).

DM, diabetes mellitus; eGFR, estimated glomerular filtration rate (by MDRD-4 equation); GN, glomerulonephritis; RAS, renin-angiotensin system; SCH, subclinical hypothyroidism.
