# Supplementary material
Source: PubMed Central journal article supplement (PMC3675831)
Supplement: Supp_Table2.pdf [file Supp_Table2.pdf]

SUPPLEMENTARY TABLE S2. DEMOGRAPHIC, CLINICAL, AND BIOCHEMICAL CHARACTERISTICS OF THE PATIENTS ACCORDING TO TSH LEVELS AT THE TIME OF COMMENCEMENT OF THYROID HORMONE REPLACEMENT THERAPY

|                                      | Total (n=113)     | TSH > 8 $\mu$ IU/mL (n=43) | TSH $\leq$ 8 $\mu$ IU/mL (n=70) | p-Value |
|--------------------------------------|-------------------|----------------------------|---------------------------------|---------|
| Age (years)                          | 63.2 $\pm$ 12.7   | 60.7 $\pm$ 12.3            | 59.8 $\pm$ 13.0                 | 0.70    |
| Men                                  | 36 (31.9%)        | 17 (39.5%)                 | 19 (27.1%)                      | 0.17    |
| DM                                   | 44 (38.9%)        | 19 (44.2%)                 | 25 (35.7%)                      | 0.37    |
| Hypertension                         | 69 (61.1%)        | 30 (69.8%)                 | 39 (55.7%)                      | 0.14    |
| CVD                                  | 17 (15.0%)        | 6 (14%)                    | 11 (15.7%)                      | 0.80    |
| Primary disease                      |                   |                            |                                 |         |
| Diabetic nephropathy                 | 44 (38.9%)        | 19 (44.2%)                 | 25 (35.7%)                      | 0.37    |
| Hypertensive nephrosclerosis         | 42 (37.2%)        | 17 (39.5%)                 | 25 (35.7%)                      | 0.68    |
| Chronic GN                           | 17 (15.1%)        | 6 (14.0%)                  | 11 (15.7%)                      | 0.80    |
| Tubulointerstitial nephritis         | 6 (5.3%)          | 2 (4.8%)                   | 4 (5.7%)                        | 0.83    |
| Others                               | 4 (3.5%)          | 1 (2.3%)                   | 3 (2.7%)                        | 0.86    |
| Systolic blood pressure (mmHg)       | 148.9 $\pm$ 17.8  | 145.0 $\pm$ 16.9           | 148.5 $\pm$ 19.2                | 0.58    |
| Diastolic blood pressure (mmHg)      | 86.5 $\pm$ 11.0   | 84.1 $\pm$ 10.8            | 85.8 $\pm$ 11.6                 | 0.56    |
| Mean arterial pressure (mmHg)        | 107.3 $\pm$ 11.7  | 105.9 $\pm$ 11.0           | 108.4 $\pm$ 12.3                | 0.43    |
| Thyroid function test                |                   |                            |                                 |         |
| T3 (ng/mL)                           | 1.08 $\pm$ 0.29   | 0.98 $\pm$ 0.29            | 1.14 $\pm$ 0.28                 | 0.01    |
| fT4 (ng/dL)                          | 1.09 $\pm$ 0.22   | 1.07 $\pm$ 0.21            | 1.11 $\pm$ 0.22                 | 0.31    |
| TSH ( $\mu$ IU/mL)                   | 8.86 $\pm$ 5.71   | 13.13 $\pm$ 7.48           | 6.24 $\pm$ 0.80                 | <0.001  |
| TPOAb $\geq$ 60 IU/mL                | 45 (39.8%)        | 19 (42.2%)                 | 26 (37.1%)                      | 0.46    |
| Serum creatinine (mg/dL)             | 1.28 $\pm$ 0.50   | 1.38 $\pm$ 0.59            | 1.22 $\pm$ 0.433                | 0.13    |
| eGFR ([mL/min]/1.73 m <sup>2</sup> ) | 59.5 $\pm$ 16.3   | 55.7 $\pm$ 17.3            | 61.9 $\pm$ 15.3                 | 0.06    |
| Serum albumin (g/dL)                 | 4.03 $\pm$ 0.89   | 4.12 $\pm$ 0.72            | 3.97 $\pm$ 0.99                 | 0.36    |
| Serum calcium (mg/dL)                | 9.26 $\pm$ 0.65   | 9.14 $\pm$ 0.73            | 9.33 $\pm$ 0.60                 | 0.13    |
| Serum phosphate (mg/dL)              | 3.84 $\pm$ 0.59   | 3.84 $\pm$ 0.66            | 3.84 $\pm$ 0.55                 | 0.94    |
| Serum cholesterol (mg/dL)            | 171.2 $\pm$ 35.5  | 169.9 $\pm$ 36.5           | 172.0 $\pm$ 35.0                | 0.76    |
| Serum triglyceride (mg/dL)           | 156.4 $\pm$ 111.8 | 158.3 $\pm$ 76.9           | 155.3 $\pm$ 128.1               | 0.91    |
| Medication use                       |                   |                            |                                 |         |
| RAS blockers                         | 78 (69.0%)        | 28 (65.1%)                 | 50 (71.4%)                      | 0.48    |
| Calcium channel blockers             | 37 (32.7%)        | 16 (37.2%)                 | 21 (30.0%)                      | 0.43    |
| $\beta$ -blockers                    | 30 (26.5%)        | 10 (23.3%)                 | 20 (28.6%)                      | 0.53    |
| Diuretics                            | 43 (38.1%)        | 12 (27.9%)                 | 31 (44.3%)                      | 0.08    |
| Other anti-hypertensive drugs        | 5 (4.4%)          | 2 (5.0%)                   | 3 (4.3%)                        | 0.89    |
| Statins                              | 36 (31.9%)        | 13 (30.2%)                 | 23 (32.9%)                      | 0.77    |

Values are expressed as mean  $\pm$  standard deviation or number (percentage).  
TPOAb, anti-thyroid peroxidase antibody.
